# Supplementary material for: Geometry variation in porous covalent triazine polymer (CTP) for CO2 adsorption
Source: Royal Society of Chemistry journal article supplement (doi:10.1039/c8nj00638e), 2018-01-01
Supplement: c8nj00638e1.pdf [file c8nj00638e1.pdf]

Tab.S1 CHN elements content of ACTPs

|    |              | ACTP-1 | ACTP-2 |
|----|--------------|--------|--------|
| %C | Experimental | 45.3   | 65.1   |
|    | Theoretical  | 60.8   | 72.4   |
| %H | Experimental | 4.3    | 5.9    |
|    | Theoretical  | 3.8    | 6.8    |
| %N | Experimental | 24.8   | 20.5   |
|    | Theoretical  | 35.4   | 21.0   |

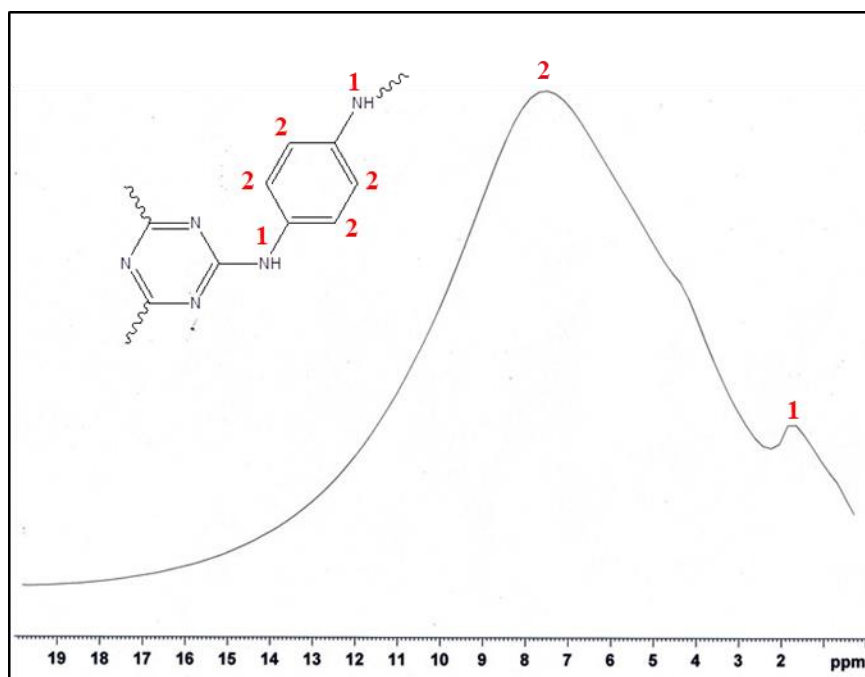

Fig.S1 Solid state  $^1\text{H}$  NMR of ACTP-1.

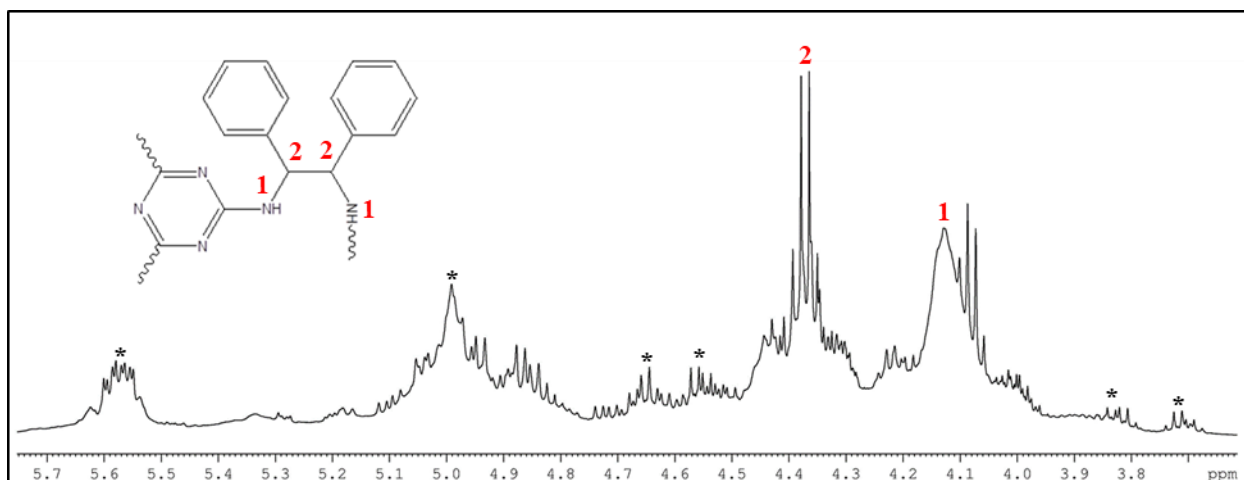

Fig.S2a Liquid state <sup>1</sup>H NMR of ACTP-2 in the region of 3.7 ppm to 5.7 ppm. Asterisks denote spinning sidebands

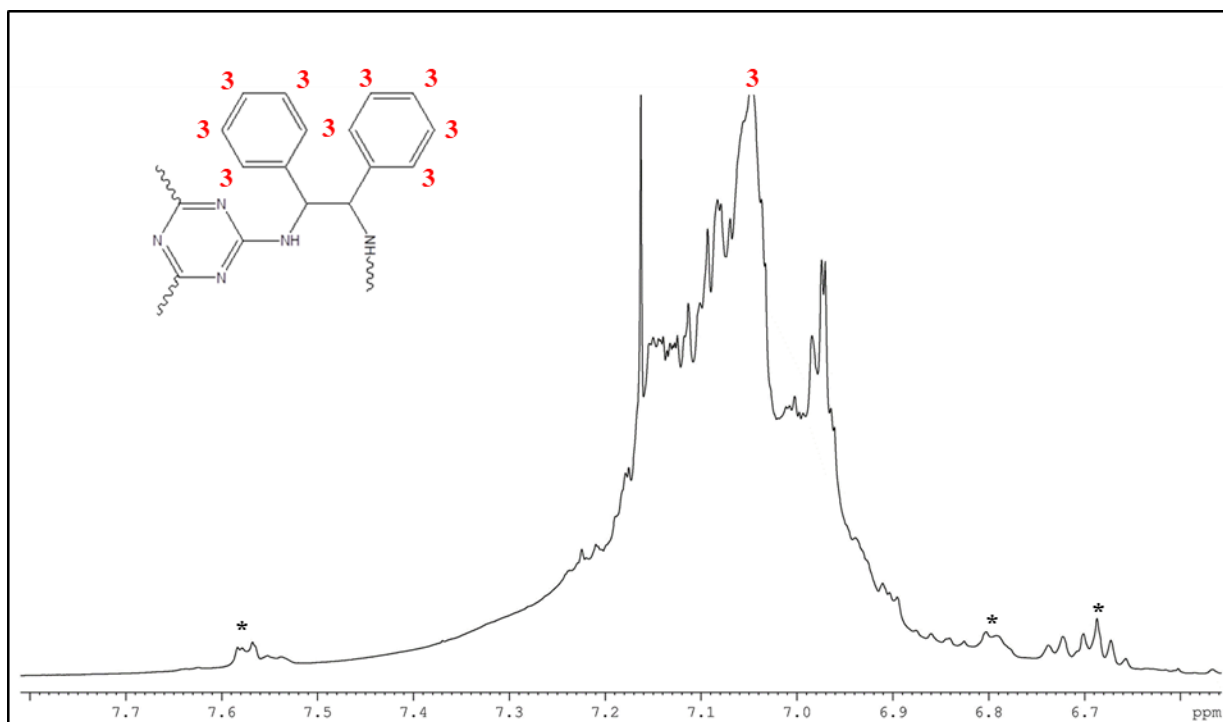

Fig.S2b Liquid state <sup>1</sup>H NMR of ACTP-2 in the region of 6.6 ppm to 7.7 ppm. Asterisks denote spinning sidebands
